# Supplementary material for: Excavation of a Novel Transcription Factors-related Prognostic Signature for Osteosarcoma
Source: Research Square preprint supplement (doi:10.21203/rs.3.rs-847325/v1), 2021-09-13
Supplement: Supplementary file 1 [file 47fe0fd1738b8251ef515f89.docx]

**Supplementary Table 1.** **The clinical characteristics of patients in TARGET and GSE39055 datasets.**

| **Variable** | **TARGET (with intact survival time)(n=85)** | **GSE39055(with intact survival time)(n=36)** |
| --- | --- | --- |
| **Gender** |  |  |
| Male | 47 | 19 |
| Female | 38 | 17 |
| **Primary site** |  |  |
| Arm/hand | 6 | NA |
| Leg/Foot | 77 | NA |
| Pelvis | 2 | NA |
| **Metastasis status** |  |  |
| Non-metastasis | 64 | NA |
| Metastasis | 21 | NA |
| **Age (years)** |  |  |
| <18 | 67 | 32 |
| >=18 | 18 | 4 |
| **Survival status** |  |  |
| Death | 27 | 10 |
| Alive | 58 | 26 |
| **Survival time** |  |  |
| ≥5 years | 28 | 3 |
| <5 years | 57* | 33 |

NA: not applicable.
